# Supplementary material for: Ferrihydrite associated organic matter (OM) stimulates reduction by Shewanella oneidensis MR-1 and a complex microbial consortia
Source: Copernicus journal article supplement (doi:10.5194/bg-2017-270), 2017-07-06
Supplement: Supplementary file 1 [file bg-2017-270-supplement.pdf]

*Supplement of*

# **Ferrihydrite associated organic matter (OM) stimulates reduction by *Shewanella oneidensis* MR-1 and a complex microbial consortia**

**Rebecca E. Cooper, et al.**

*Correspondence to:* Kirsten Küsel (kirsten.kuesel@uni-jena.de)

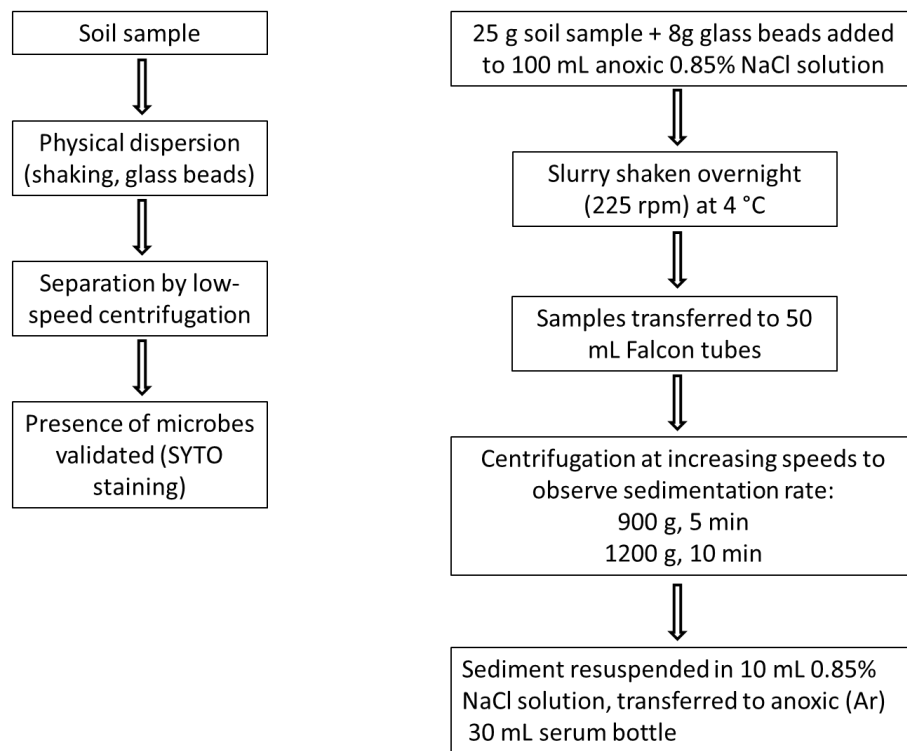

**Supplemental Figure 1.** Extraction of microbial community from peat cores. (A) Generalized flow chart for the extraction of bacteria from peat soil samples obtained from the Schlöppnerbrunnen fen (see text for details). (B) Detailed flow chart for the extraction of bacteria from peat soil samples obtained from the Schlöppnerbrunnen fen (see text for details).
